# Supplementary material for: Diversified Rice Farms with Vegetable Plots and Flower Strips Are Associated with Fewer Pesticide Applications in the Philippines
Source: MDPI journal article supplement (doi:10.3390/insects14100778), 2023-09-22
Supplement: s1 [file s1]

## Supplementary Information

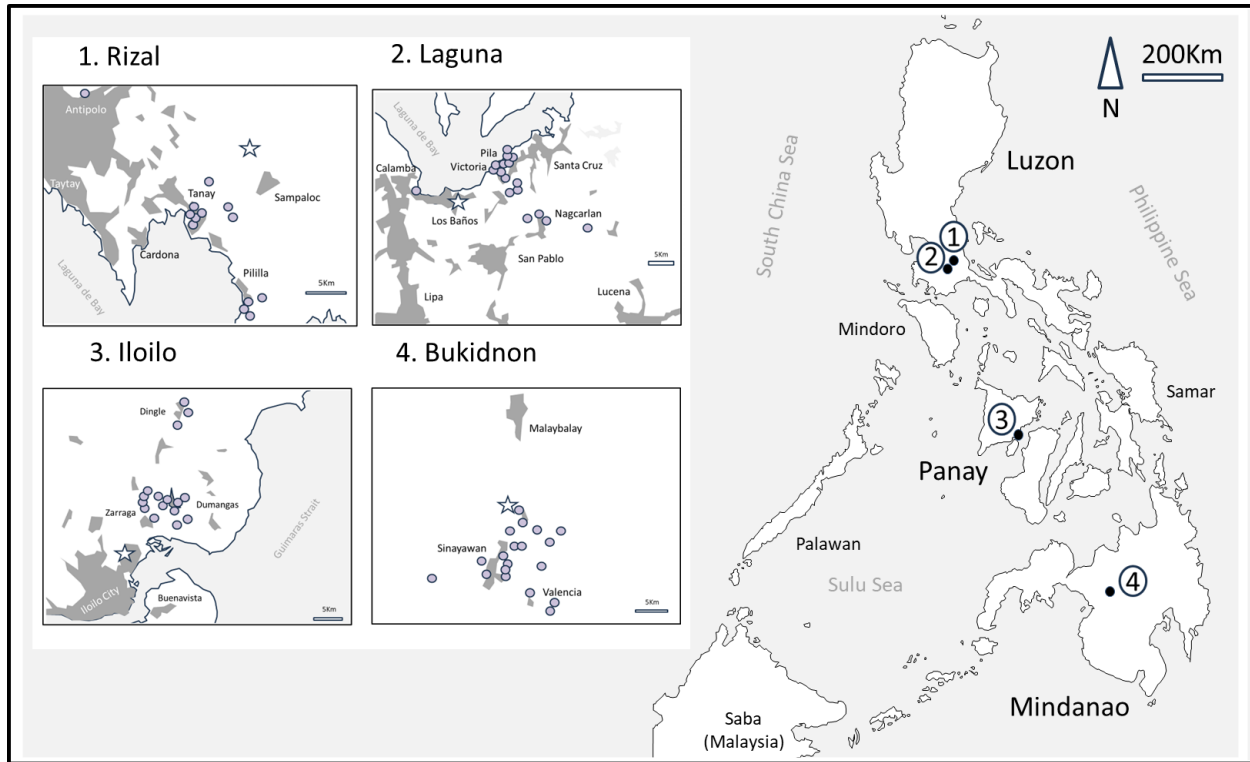

**Figure S1.** Map of the Philippine Archipelago showing the locations of study regions (numbered in circles), demonstration farms (stars) and farmers' villages (circles). Urbanized areas are indicated in inset maps by dark shading.

**Table S1.** List of the predictor variables included in the calculation of the DistLM models

| Predicting Variable                | Type of Variable and Levels                                                                                          |
|------------------------------------|----------------------------------------------------------------------------------------------------------------------|
| Age                                | Numerical                                                                                                            |
| Gender                             | Categorical, 2 levels: male, female                                                                                  |
| Region                             | Categorical, 4 levels: Iloilo, Laguna, Bukidnon, Tanay                                                               |
| Education                          | Categorical, 5 levels: Elementary, Highschool, Undergraduate, Vocational, College graduate, Postgraduate, Self-study |
| Rice as main crop                  | Categorical, 2 levels: Yes, No                                                                                       |
| Other incomes                      | Categorical, 5 levels: Other crops, Livestock, Retail/shop, Employment, No other income                              |
| Experience as a rice farmer        | Numerical                                                                                                            |
| Ownership                          | Categorical, 2 levels: Yes, No                                                                                       |
| Weekly visits to the farm          | Numerical                                                                                                            |
| Belongs to a farmers' organization | Categorical, 2 levels: Yes, No                                                                                       |
| Rice area                          | Numerical                                                                                                            |
| Uses biocontrol                    | Categorical, 2 levels: Yes, No                                                                                       |
| Harvests ratoon                    | Categorical, 2 levels: Yes, No                                                                                       |
| Grows vegetables                   | Categorical, 2 levels: Yes, No                                                                                       |
| Diversity of vegetables grown      | Numerical                                                                                                            |
| Ecological literacy                | Numerical                                                                                                            |
| Wild harvest                       | Categorical, 2 levels: Yes, No                                                                                       |
| Flowers planted on bunds           | Categorical, 2 levels: Yes, No                                                                                       |
| Raise ducks                        | Categorical, 2 levels: Yes, No                                                                                       |
| Hunts snails in the field          | Categorical, 2 levels: Yes, No                                                                                       |

**Table S2:** Profiles of the farmers surveyed at the four sites

| Farmer Profiles                                         | Region              |                    |                     |                       | DF | Test<br>Statistic <sup>1</sup> | P-<br>value | Valid<br>Answers |
|---------------------------------------------------------|---------------------|--------------------|---------------------|-----------------------|----|--------------------------------|-------------|------------------|
|                                                         | Laguna <sup>2</sup> | Rizal <sup>2</sup> | Iloilo <sup>2</sup> | Bukidnon <sup>2</sup> |    |                                |             |                  |
| 1 Age (Years)                                           | 55.96<br>(1.39)b    | 52.60<br>(1.60)ab  | 56.92<br>(0.89)b    | 51.04<br>(1.13)a      | 3  | 5.575                          | 0.001       | 300              |
| 2 Gender (% Male)                                       | 73.68ab             | 94.83b             | 43.75a              | 60.19ab               | 3  | 48.362                         | <0.001      | 302              |
| 3 Education Attained                                    |                     |                    |                     |                       |    |                                |             |                  |
| a % Primary (%)                                         | 32.14b              | 23.21ab            | 7.29a               | 22.34ab               | 6  | 25.823                         | <0.001      | 302              |
| b Secondary (%)                                         | 39.29a              | 51.76b             | 38.54a              | 32.98a                |    |                                |             |                  |
| c Tertiary (%)                                          | 28.57a              | 25.00a             | 54.17b              | 44.68ab               |    |                                |             |                  |
| 4 Rice Production as Main Income (%)                    | 85.71               | 89.29              | 89.58               | 84.04                 | 3  | 1.247                          | 0.65        | 301              |
| 5 Rice-Growing Experience (Years)                       | 26.68<br>(1.98)     | 25.29<br>(1.97)    | 21.52<br>(1.53)     | 23.30<br>(1.46)       | 3  | 1.748                          | 0.157       | 293              |
| 6 Farm Size (ha)                                        | 1.52<br>(0.17)a     | 1.84<br>(0.33)a    | 1.65<br>(0.13)a     | 3.02<br>(0.28)b       | 3  | 9.895                          | <0.001      | 292              |
| 7 Rice Area Owned by Farmer (%)                         | 36.96<br>(6.59)a    | 24.89<br>(5.64)a   | 64.80<br>(4.79)b    | 94.27<br>(1.94)c      | 3  | 42.416                         | <0.001      | 292              |
| 8 Other Income Generating Activities                    |                     |                    |                     |                       |    |                                |             |                  |
| a Produce Other Crops (%)                               | 7.14a               | 13.79a             | 18.75a              | 35.11b                | 12 | 33.224                         | 0.001       | 302              |
| b Farm Livestock or Fish (%)                            | 25.00a              | 32.76b             | 23.96a              | 27.66a                |    |                                |             |                  |
| c Retail (%)                                            | 17.86b              | 15.52b             | 12.50b              | 5.32a                 |    |                                |             |                  |
| d Other Employment (%)                                  | 25.00a              | 27.58a             | 32.29a              | 19.15a                |    |                                |             |                  |
| e No Other Income (%)                                   | 25.00a              | 10.34a             | 12.50a              | 12.77a                |    |                                |             |                  |
| 9 Land Ownership (% Owing Land) <sup>3</sup>            | 30.36a              | 25.00a             | 53.13b              | 72.73b                | 3  | 41.153                         | <0.001      | 296              |
| 10 Farmers Producing Other Crops (%)                    | 44.64a              | 67.86b             | 71.88b              | 75.53b                | 3  | 16.856                         | 0.001       | 302              |
| 11 Farm Area Dedicated to Other Crops (ha) <sup>4</sup> | 0.24<br>(0.07)a     | 0.44<br>(0.10)ab   | 0.42<br>(0.13)ab    | 0.74<br>(0.17)b       | 3  | 2.858                          | 0.038       | 247              |
| 12 Farm Area Dedicated to Other Crops (%) <sup>4</sup>  | 11.49<br>(3.11)a    | 19.00<br>(3.30)b   | 13.48<br>(2.15)ab   | 15.88<br>(2.91)ab     | 3  | 2.724                          | 0.045       | 247              |
| 13 Visits to Farm (Number per Week) <sup>4</sup>        | 5.16<br>(0.29)ab    | 5.84<br>(0.25)b    | 5.96<br>(0.19)b     | 4.37<br>(0.27)a       | 3  | 8.686                          | <0.001      | 297              |

<sup>1</sup>: Test statistics for 1, 5, 6, 7, 11, 12 and 13 are F-value, all others are X<sup>2</sup>-values. 2: Lowercase letters indicate homogenous groups based on Tukey tests ( $P < 0.05$ ) for F-values and tests of partial homogenization ( $P \leq 0.05$ ). 3: Farmers were categorized as land owners where the majority of their farmed area was self-owned. 4: Data was ranked before analysis.

**Table S3:** Biotic constraints to rice production during wet (WS) and dry (DS) seasons as indicated by farmers.

| Biotic constraint                                                                    | Laguna |       | Rizal |       | Iloilo |       | Bukidnon |       | Total number of farmers |    |
|--------------------------------------------------------------------------------------|--------|-------|-------|-------|--------|-------|----------|-------|-------------------------|----|
|                                                                                      | DS     | WS    | DS    | WS    | DS     | WS    | DS       | WS    | DS                      | WS |
| Rodents/rats                                                                         | 20.41  | 26.67 | 14.89 | 20.51 | 3.61   | 2.38  | 5.13     | 8.97  | 24                      | 29 |
| Ricebug ( <i>Leptocorisa</i> spp.)                                                   | 12.24  | 17.78 | 19.15 | 20.51 | 13.25  | 9.52  | 14.10    | 7.69  | 37                      | 30 |
| Blackbug ( <i>Scotinophara</i> spp.)                                                 | 10.20  | 15.56 | 2.13  |       | 3.61   | 2.38  | 23.08    | 14.10 | 27                      | 20 |
| Stemborers ( <i>Chilo</i> spp.; <i>Scirpophaga</i> spp.; <i>Sesamia</i> sp.)         | 12.24  |       | 8.51  | 7.69  | 19.28  | 14.29 | 35.90    | 33.33 | 54                      | 41 |
| Weeds                                                                                |        |       | 4.26  | 7.69  | 6.02   | 4.76  | 0.00     |       | 7                       | 7  |
| Golden apple snail ( <i>Pomacea canaliculata</i> Lamarck)                            | 22.45  | 24.44 | 8.51  | 15.38 | 8.43   | 13.10 | 0.00     | 1.28  | 22                      | 29 |
| Green leafhopper ( <i>Nephotettix</i> spp.)                                          | 4.08   | 2.22  | 4.26  | 5.13  | 6.02   | 14.29 | 3.85     | 12.82 | 12                      | 25 |
| Planthoppers ( <i>Nilaparvata lugens</i> Stål; <i>Sogatella furcifera</i> (Horvath)) |        |       | 2.13  | 0.00  | 14.46  | 13.10 | 2.56     | 5.13  | 15                      | 15 |
| Blast ( <i>Magnaporther grisea</i> (T.T. Hebert) M.E. Barr)                          |        | 2.22  |       | 0.00  |        | 1.19  |          |       | 0                       | 2  |
| Tungro disease (transmitted by leafhoppers)                                          | 6.12   | 2.22  | 17.02 | 10.26 | 4.82   | 2.38  | 2.56     | 2.56  | 17                      | 9  |
| Leaf blight ( <i>Xanthomonas oryzae</i> (Ishiyama) Swings et al)                     |        |       | 0.00  |       | 2.41   | 3.57  | 1.28     |       | 4                       | 3  |
| Army worm ( <i>Mythimna</i> spp.)                                                    | 12.24  |       | 2.13  |       |        |       | 2.56     | 1.28  | 9                       | 1  |
| Birds                                                                                |        |       | 8.51  | 7.69  | 2.41   | 2.38  |          |       | 6                       | 5  |
| Fungi                                                                                |        | 4.44  | 2.13  |       | 1.20   | 3.57  |          |       | 2                       | 5  |
| Mole cricket (Gryllotalpidae)                                                        |        | 2.22  |       |       | 1.20   |       |          |       | 1                       | 1  |
| leaf folder ( <i>Cnaphalocrocis medinalis</i> (Guenée))                              |        |       |       | 2.56  | 1.20   | 1.19  |          |       | 1                       | 2  |
| ladybeetles (Coccinellidae: Coleoptera)                                              |        |       | 4.26  | 2.56  |        |       |          |       | 2                       | 1  |
| maggots ( <i>Hydrellia</i> spp.)                                                     |        |       |       |       |        | 1.19  |          | 1.28  | 0                       | 2  |
| Grasshoppers                                                                         |        |       | 2.13  |       |        |       |          |       | 1                       | 0  |
| brownspot ( <i>Cochliobolus miyabeanus</i> )                                         |        |       |       |       | 1.20   |       |          |       | 1                       | 0  |

|                                                              |      |      |   |   |
|--------------------------------------------------------------|------|------|---|---|
| Caterpillars                                                 | 1.28 | 1.28 | 1 | 1 |
| Rice grain bug ( <i>Paraeucosmetus pallicornis</i> (Dallas)) | 6.41 | 6.41 | 5 | 5 |
| crawfish                                                     |      | 1.28 | 0 | 1 |

1: Numbers are percentages of farmers mentioning each constraint as their main (top ranked) problem.

**Table S4:** Differences between farmers' perception about the most harmful pests, based on region. SIMPER analyses show the pests (in order of importance) contributing most to the dissimilarity between regions, in both seasons.

| Season     | Pest species | Iloilo vs. Laguna |        | Iloilo vs. Tanay |        | Iloilo vs. Bukidnon |        | Laguna vs. Bukidnon |        | Laguna vs. Tanay |        | Bukidnon vs. Tanay |        |
|------------|--------------|-------------------|--------|------------------|--------|---------------------|--------|---------------------|--------|------------------|--------|--------------------|--------|
|            |              | Contrib. %        | Cum. % | Contrib. %       | Cum. % | Contrib. %          | Cum. % | Contrib. %          | Cum. % | Contrib. %       | Cum. % | Contrib. %         | Cum. % |
| Dry Season | Stemborer    | 13.14 (I)         | 13.14  | 13.99 (I)        | 13.99  | 15.52 (B)           | 15.52  | 15.85 (B)           | 15.85  | 13.50 (L)        | 13.50  | 16.50 (B)          | 16.50  |
|            | Rice bug     | 13.00 (I)         | 26.14  | 14.23 (T)        | 28.22  | 13.61 (B)           | 29.13  | 13.92 (B)           | 29.77  | 14.70 (T)        | 28.20  | 15.02 (T)          | 31.52  |
|            | Black bug    | 10.33 (L)         | 36.47  | 7.09 (T)         | 35.31  | 11.52 (B)           | 40.65  | 14.21 (B)           | 43.98  | 11.80 (L)        | 40.00  | 12.78 (B)          | 44.30  |
|            | Rats         | 9.57 (L)          | 46.04  | 10.33 (T)        | 45.64  | 6.68 (I)            | 47.33  | 9.89 (L)            | 53.87  | 12.88 (T)        | 52.88  | 10.49 (T)          | 54.79  |
|            | GAS          | 8.19 (L)          | 54.23  | 6.69 (I)         | 52.33  | 6.30 (I)            | 53.63  | 7.72 (L)            | 61.59  | 8.12 (L)         | 61.00  | 5.68 (T)           | 60.47  |
| Wet season | Stemborer    | 11.28 (I)         | 11.28  | 12.28 (I)        | 12.28  | 14.60 (B)           | 14.60  | 15.02 (B)           | 15.02  | 11.36 (T)        | 11.36  | 15.32 (B)          | 15.32  |
|            | Rice bug     | 13.50 (L)         | 24.78  | 12.40 (I)        | 24.68  | 13.06 (B)           | 27.66  | 14.61 (L)           | 29.63  | 13.99 (L)        | 25.35  | 13.07 (B)          | 28.39  |
|            | Rats         | 10.70 (L)         | 35.48  | 11.05 (T)        | 35.73  | 8.63 (B)            | 36.29  | 11.94 (L)           | 41.57  | 13.67 (L)        | 39.02  | 11.94 (T)          | 40.33  |
|            | Black bug    | 8.57 (L)          | 44.05  | 3.80 (T)         | 39.53  | 9.51 (B)            | 45.80  | 13.16 (B)           | 54.73  | 10.06 (L)        | 49.08  | 10.73 (B)          | 51.06  |
|            | GAS          | 10.67 (I)         | 54.72  | 10.76 (I)        | 50.29  | 9.97 (I)            | 55.77  | 10.23 (L)           | 64.96  | 11.00 (L)        | 60.08  | 9.91 (T)           | 60.97  |

The letter in brackets indicate the region in which each pest is more reported ('B' = Bukidnon, 'I' = Iloilo, 'L' = Laguna, 'T' = Tanay). 'Contrib. %' indicates the contribution to dissimilarity between pairs of regions, expressed as a percentage. 'Cum. %' indicates cumulative dissimilarity between pairs of regions, expressed as a percentage. 'GAS' indicates Golden apple snail.

**Table S5.** The plants grown by the rice farmers as mentioned during the interviews

| English Name    | Scientific Name                                                          |
|-----------------|--------------------------------------------------------------------------|
| Ladyfinger      | <i>Abelmoschus esculentus</i> (L.) Moench                                |
| Calamus         | <i>Acorus</i> spp.                                                       |
| Yellow bells    | <i>Allamanda cathartica</i> L.                                           |
| Onions          | <i>Allium cepa</i> L.                                                    |
| Garlic          | <i>Allium sativum</i> L.                                                 |
| Amaranth        | <i>Amaranthus viridis</i> L.                                             |
| Pineapple       | <i>Ananas comosus</i> (L.) Merr.                                         |
| Guyabano        | <i>Annona muricata</i> L.                                                |
| Jack fruit      | <i>Artocarpus heterophyllus</i> Lam.                                     |
| Asparagus       | <i>Asparagus</i> spp.                                                    |
| Star fruit      | <i>Averrhoa carambola</i> L.                                             |
| Malabar spinach | <i>Basella alba</i> L.                                                   |
| Bougainvillea   | <i>Bougainvillea</i> spp.                                                |
| Mustard         | <i>Brassica juncea</i> (L.) Czern.                                       |
| Kohlrabi        | <i>Brassica oleracea</i> L.                                              |
| Pichay          | <i>Brassica rapa</i> L.                                                  |
| Pigeon pea      | <i>Cajanus cajan</i> (L.) Millsp.                                        |
| Bell peppers    | <i>Capsicum annuum</i> L.                                                |
| Chilies         | <i>Capsicum</i> spp.                                                     |
| Papaya          | <i>Carica papaya</i> L.                                                  |
| Chrysanthemum   | <i>Chrysanthemum indicum</i> L.                                          |
| Watermelon      | <i>Citrullus lanatus</i> (Thunb.) Matsum. & Nakai                        |
| Calamansi       | <i>Citrus × microcarpa</i> Bunge                                         |
| Coconut         | <i>Cocos nucifera</i> L.                                                 |
| Taro            | <i>Colocasia esculenta</i> (L.) Schott                                   |
| Jute            | <i>Corchorus</i> spp.                                                    |
| Cosmos          | <i>Cosmos</i> spp.                                                       |
| Melon           | <i>Cucumis melo</i> L.                                                   |
| Cucumber        | <i>Cucumis sativus</i> L.                                                |
| Pumpkin         | <i>Cucurbita moschata</i> Duchesne                                       |
| Squash          | <i>Cucurbita</i> spp.                                                    |
| Lemongrass      | <i>Cymbopogon citratus</i> (DC.) Stapf                                   |
| Carrots         | <i>Daucus carota</i> subsp. <i>sativus</i> (Hoffm.) Schübl. & G. Martens |
| Soybean         | <i>Glycine max</i> (L.) Merr.                                            |
| Camia           | <i>Hedychium philippinense</i> K. Schum.                                 |
| Sunflower       | <i>Helianthus annuus</i> L.                                              |
| Roselle         | <i>Hibiscus sabdariffa</i> L.                                            |
| Hibiscus        | <i>Hibiscus syriacus</i> L.                                              |
| Water spinach   | <i>Ipomoea aquatica</i> Forssk.                                          |
| Sweet potato    | <i>Ipomoea batatas</i> (L.) Lam.                                         |
| Lettuce         | <i>Lactuca sativa</i> L.                                                 |
| Bottle gourd    | <i>Lagenaria siceraria</i> (Molina) Standl.                              |
| Lantana         | <i>Lantana camara</i> L.                                                 |
| Luffa           | <i>Luffa acutangula</i> (L.) Roxb.                                       |
| Cassava         | <i>Manihot esculenta</i> Crantz                                          |
| Butterdaisy     | <i>Melampodium divaricatum</i> L.                                        |
| Bitter gourd    | <i>Momordica charantia</i> L.                                            |

|                |                                                                  |
|----------------|------------------------------------------------------------------|
| Moringa        | <i>Moringa oleifera</i> Lam.                                     |
| Banana         | <i>Musa acuminata</i> Colla                                      |
| Tobacco        | <i>Nicotiana tabacum</i> L.                                      |
| Lima bean      | <i>Phaseolus lunatus</i> L.                                      |
| Green beans    | <i>Phaseolus vulgaris</i> L.                                     |
| Peas           | <i>Pisum sativum</i> L.                                          |
| Winged bean    | <i>Psophocarpus tetragonolobus</i> (L.) D.C.                     |
| Radish         | <i>Raphanus raphanistrum</i> subsp. <i>sativus</i> (L.) Domin    |
| Sugarcane      | <i>Saccharum officinarum</i> L.                                  |
| Chayote squash | <i>Sechium edule</i> (Jacq.) Sw.                                 |
| Tomato         | <i>Solanum lycopersicum</i> L.                                   |
| Eggplant       | <i>Solanum melongena</i> L.                                      |
| Marigolds      | <i>Tagetes erecta</i> L.                                         |
| Spinach        | <i>Talinum fruticosum</i> (L.) Juss.                             |
| Mung bean      | <i>Vigna radiata</i> (L.) R. Wilczek                             |
| Cowpea         | <i>Vigna unguiculata</i> (L.) Walp.                              |
| Stringbean     | <i>Vigna unguiculata</i> subsp. <i>sesquipedalis</i> (L.) Verdc. |
| Maize          | <i>Zea mays</i> L.                                               |
| Ginger         | <i>Zingiber officinale</i> Roscoe                                |
| Zinnia         | <i>Zinnia peruviana</i> (L.) L.                                  |

---
